# Supplementary material
Source: Research Square preprint supplement (doi:10.21203/rs.3.rs-9633033/v1)
Supplement: Supplementary file 1 [file a0f198c4abc0f0e01c85ecc1.docx]

**Table 1**. Biometric parameters measured by Pentacam and IOLMaster before and after SMILE surgery (mean ± SD).

| Parameter | Pentacam | | | Iol-Master | | |
| --- | --- | --- | --- | --- | --- | --- |
| Preoperative | 1 month postoperative | 3 months postoperative | preoperative | 1 month postoperative | 3 months postoperative |
| AL (mm) | - | - | - | 25.64 ± 0.56 | 25.55 ± 0.60 | 25.54 ± 0. 66 |
| AL* (mm) | - | - | - | 25.08 ± 0.56 | 25.09 ± 0.52 | 25.07 ± 0.66 |
| ICACD (mm) | 3.74 ± 0.23 | 3.60 ± 0.25 | 3.60 ± 0.25 | 3.79 ± 0.23 | 3.66 ± 0.23 | 3.66 ± 0.23 |
| ECACD (mm) | 3.20 ± 0.24 | 3.13 ± 0.25 | 3.13 ± 0.25 | 3.25 ± 0.23 | 3.20 ± 0.24 | 3.20 ± 0.24 |
| SimK/Km (D) | 42.83 ± 1.15 | 38.88 ± 1.28 | 38.89 ± 1.18 | 43.08 ± 1.15 | 38.97 ± 1.24 | 38.98 ± 1.20 |
| TCRP (D) | 42.20 ± 1.16 | 37.26 ± 1.35 | 37.31 ± 1.24 | - | - | - |

AL: axial length; AL*: axial length minus central corneal thickness; ICACD: internal anterior chamber depth (including corneal thickness); ECACD: external anterior chamber depth (ICACD minus central corneal thickness); Km: mean keratometry measured by IOLMaster; SimK: simulated keratometry measured by Pentacam; TCRP: total corneal refractive power measured by Pentacam. All values are expressed as mean ± standard deviation. (—): parameter not applicable to the respective instrument.

**Table 2**. Linear mixed model analysis of biometric parameters before and after SMILE surgery.

|  | Pentacam | | | | | | Iol-Master | | | | | |
| --- | --- | --- | --- | --- | --- | --- | --- | --- | --- | --- | --- | --- |
| 1 month postoperative VS Preoperative | | 3 months postoperative VS Preoperative | | 1 month postoperative VS Preoperative | | 1 month postoperative VS Preoperative | | 3 months postoperative VS Preoperative | | 1 month postoperative VS 3 months postoperative | |
|  | t | p | t | p | t | p | t | p | t | p | t | p |
| AL | - | - | - | - | - | - | 3.05 | <0.001 | 4.56 | <0.001 | 0.72 | 0.46 |
| AL* | - | - | - | - | - | - | -0.26 | 0.85 | 0.35 | 0.74 | 0.85 | 0.45 |
| ICACD | 9.81 | <0.001 | 17.75 | <0.001 | -0.58 | 0.68 | 15.85 | <0.00 | 10.86 | <0.001 | -0.45 | 0.66 |
| ECACD | 4.75 | <0.001 | 8.72 | <0.001 | -0.42 | 0.30 | 6.06 | <0.001 | 3.96 | <0.001 | -0.25 | 0.82 |
| SimK  /Km | 30.88 | <0.001 | 34.73 | <0.001 | -0.96 | 0.66 | 31.22 | <0.001 | 34.52 | <0.001 | -0.35 | 0.76 |

Overall tests:

Corneal power:

Time effect P < 0.001; Instrument effect P = 0.32; Time × instrument interaction P = 0.48

Anterior chamber depth:

Time effect P < 0.001; Instrument effect P = 0.54; Time × instrument interaction P = 0.63

Linear mixed‑effects models with random intercept for patient were used to account for inter‑eye correlation.

A linear mixed model was used to account for inter-eye correlation. P < 0.05 was considered statistically significant.

**Table 3.** Pearson correlation analysis between changes in ICACD and corneal ablation thickness before and after SMILE surgery.

| Comparison | Range (mm) | Corneal ablation thickness | |
| --- | --- | --- | --- |
| r | p |
| IOLMaster ICACD: preoperative vs. 1 month postoperative | 0.11-0.15 | 0.19 | 0.10 |
| IOLMaster ICACD: preoperative vs. 3 months postoperative | 0.10-0.15 | 0.13 | 0.24 |
| Pentacam ICACD: preoperative vs. 1 month postoperative | 0.13-0. 19 | 0.14 | 0.20 |
| Pentacam ICACD: preoperative vs. 3 months postoperative | 0.13-0.17 | 0.20 | 0.08 |

*P<0.05; **P<0.01.

**Table 4.** Pearson correlation analysis of ICACD measurements obtained by Pentacam and IOLMaster before and after SMILE surgery.

| Pearson | | | | |
| --- | --- | --- | --- | --- |
|  | Mean (mm) | SD (mm) | Pentacam ICACD | IOLMaster ICACD |
| Pentacam ICACD | 3.685 | 0.243 | 1 |  |
| IOLMaster ICACD | 3.715 | 0.234 | 0.912*** | 1 |
| *p<0.1; **p<0.05; ***p<0.01. | | | | |

**Table 5.** Comparison of Pentacam-derived TCRP and SimK values before and after SMILE surgery.

| Parameter | preoperative | 1 month postoperative | 3 months postoperative |
| --- | --- | --- | --- |
| TCRP (D) | 42.22 ± 1.16 | 37.27 ± 1.34 | 37.42 ± 1.24 |
| SimK (D) | 42.83 ± 1.16 | 38.86 ± 1.26 | 38.90 ± 1.16 |
| t | -29.66 | -36.16 | -48.24 |
| p | <0.001 | <0.001 | <0.001 |

All values are expressed as mean ± standard deviation.

**Table 6.** Pearson correlation analysis between Holladay 1 and Haigis effective lens position predictions derived from Pentacam and IOLMaster after SMILE surgery.

| Pearson | | |
| --- | --- | --- |
|  | Pentacam Holladay 1 (ELP) | IOLMaster Holladay 1 (ELP) |
| Pentacam Haigis (d) | 0.267*** | 0.262*** |
| IOLMaster Haigis (d) | 0.265*** | 0.255*** |
| * P < 0.1; ** P < 0.05; *** P < 0.01. Pearson correlation coefficients ranged from 0.255 to 0.267 (all P < 0.01). | | |
