# Supplementary material
Source: Research Square preprint supplement (doi:10.21203/rs.3.rs-9633033/v1)
Supplement: Supplementary file 2 [file fd08d2bb55ba762fe65d8b27.xlsx]

## Sheet: Sheet4
病案号	姓名	性别	眼别	年龄	切削深度	术前眼压	术后1个月眼压	术后3个月眼压	术前视力	术前视力LogMAR	术后1个月视力	术后1个月视力LogMAR	术后3个月视力	术后3个月视力LogMAR	术前球镜度数	术前柱镜度数	术后1个月柱镜度数	术后3个月柱镜度数	术后1个月球镜度数	术后3个月球镜度数	术前Pentacam 前房深度(ACD=ACD*)	术前Pentacam 中央角膜厚度(CCT)	术前Pentacam (ACD+CCT)	PentacamTCRP角膜曲率（Km)	Pentacam前表面角膜曲率（Km)	Pentacam前表面曲率半径（R)	术后1个月Pentacam 前房深度(ACD=ACD*)	术后1个月Pentacam 中央角膜厚度(CCT)	术后1个月Pentacam (ACD+CCT)	Pentacam术后1个月与术前(ACD+CCT)差值	术后1个月PentacamTCRP角膜曲率（Km)	术后1个月Pentacam前表面角膜曲率（Km)	术后1个月Pentacam前表面曲率半径（R)	术后3个月Pentacam 前房深度(ACD=ACD*)	术后3个月Pentacam 中央角膜厚度(CCT)	术后3个月Pentacam (ACD+CCT)	Pentacam术后3个月与术前(ACD+CCT)差值	术后3个月PentacamTCRP角膜曲率（Km)	术后3个月Pentacam前表面角膜曲率（Km)	术后3个月Pentacam前表面曲率半径（R)	术前Master 角膜曲率（Km)	术前Master 前房深度(ACD)	术前Master 前房深度(ACD*)	术前Master 眼轴长度（AL）	术前Master 眼轴长度（AL*）	术后1个月Master 角膜曲率（Km)	术后1个月Master 前房深度(ACD)	术后1个月与术前MAster前房深度（ACD）差值	术后1个月Master 前房深度(ACD*)
D6246	李鹏龙	1	1	19	0.075	12	11	12	0.15	0.823909	1.2	-0.0791812	1.2	-0.0791812	-3	-0.25	0	-0.25	0.25	0	3.46	0.543	4.003	39.5	40	8.43	3.44	0.476	3.916	0.087	35.8	37.1	9.09	3.36	0.482	3.842	0.161	36.1	37.3	9.05	40.205	4.02	3.477	26.15	25.607	37.335	3.9	0.12	3.424
D6246	李鹏龙	1	2	19	0.075	14	10	12	0.25	0.60206	1	0	1.2	-0.0791812	-3	-0.25	0.25	0.25	0	0	3.48	0.539	4.019	39.7	40.4	8.35	3.4	0.476	3.876	0.143	35.9	37.3	9.06	3.42	0.481	3.901	0.118	36.1	37.4	9.02	40.66	4.12	3.581	26.01	25.471	37.44	3.94	0.18	3.464
D6278	陈晨	2	1	19	0.111	16	12	11	0.15	0.823909	1	0	1	0	-4.75	-0.25	-0.5	-0.75	-0.5	-0.25	2.77	0.571	3.341	43.2	43.7	7.72	2.66	0.482	3.142	0.199	37.4	38.9	8.67	2.68	0.484	3.164	0.177	37.7	39.2	8.61	44.08	3.41	2.839	25.28	24.709	38.905	3.25	0.16	2.768
		2	2	19	0.122	19	12	11	0.25	0.60206	1	0	1.2	-0.0791812	-5.5	-0.25	0	-0.25	0	-0.75	2.66	0.571	3.231	43.2	43.5	7.76	2.66	0.48	3.14	0.091	36.4	38.2	8.84	2.68	0.495	3.175	0.056	36.8	38.4	8.8	43.755	3.37	2.799	25.54	24.969	38.095	3.22	0.15	2.74
D6265	张晓铮	2	1	18	0.097	15	10	11	0.12	0.920819	1.2	-0.0791812	1.2	-0.0791812	-4	-0.75	0.5	-0.75	0.25	0.5	3.19	0.573	3.763	42.7	43.5	7.76	3.15	0.501	3.651	0.112	38.4	39.8	8.48	3.04	0.501	3.541	0.222	38.6	39.8	8.49	44.07	3.78	3.207	25.33	24.757	39.75	3.68	0.1	3.179
		2	2	18	0.093	16	9	11	0.1	1	1.2	-0.0791812	1	0	-3.75	-0.75	0.25	0.5	0.25	0	3.14	0.571	3.711	43.2	43.9	7.69	3.09	0.498	3.588	0.123	38.4	40	8.43	2.99	0.503	3.493	0.218	38.8	39.9	8.45	44.035	3.79	3.219	25.11	24.539	40.13	3.6	0.19	3.102
D6291	张翆霞	2	1	27	0.078	17	10	10	0.12	0.920819	1	0	1.2	-0.0791812	-3	-0.5	0.5	0.5	0.25	0	2.81	0.542	3.352	43.3	43.7	7.72	2.71	0.477	3.187	0.165	39.8	41.1	8.21	2.77	0.483	3.253	0.099	39.8	41.1	8.2	43.975	3.43	2.888	24.65	24.108	41.235	3.37	0.06	2.893
		2	2	27	0.069	18	11	11	0.12	0.920819	1	0	1	0	-2.5	-0.5	0.25	0.25	-1.25	0	2.89	0.544	3.434	42.7	43.4	7.78	2.79	0.487	3.277	0.157	39.5	42.1	8.22	2.89	0.492	3.382	0.052	39.7	41.2	8.2	43.775	3.48	2.936	24.52	23.976	41.335	3.41	0.07	2.923
D6250	周伊蒙	2	1	18	0.109	18	11	12	0.15	0.823909	1	0	1	0	-4.25	-0.75	0.25	0.25	0	0.75	3.37	0.563	3.933	42.2	43	7.84	3.33	0.481	3.811	0.122	37.9	39.4	8.56	3.31	0.475	3.785	0.148	37.3	39	8.65	43.39	3.92	3.357	26.02	25.457	39.525	3.87	0.05	3.389
		2	2	18	0.094	18	10	12	0.2	0.69897	1.2	-0.0791812	1.2	-0.0791812	-3.5	-0.5	-0.5	0.25	0.5	0	3.35	0.564	3.914	42.1	43.1	7.83	3.29	0.493	3.783	0.131	38.2	40	8.45	3.26	0.49	3.75	0.164	38	39.6	8.52	43.495	3.89	3.326	25.61	25.046	40.04	3.84	0.05	3.347
D6256	张信哲	1	1	18	0.135	18	11	15	0.08	1.09691	1	0	1	0	-5.5	-0.5	0.5	-0.75	0.75	-0.25	3.02	0.564	3.584	42.1	42.5	7.94	2.91	0.449	3.359	0.225	35	37	9.12	2.91	0.446	3.356	0.228	35.6	37.1	9.09	42.945	3.56	2.996	26.31	25.746	36.985	3.4	0.16	2.951
		1	2	18	0.135	18	11	14	0.08	1.09691	1	0	1	0	-5.25	-0.5	0.5	-0.5	0.5	0.25	2.99	0.559	3.549	42.1	42.5	7.94	2.84	0.44	3.28	0.269	35.2	36.9	9.15	2.81	0.442	3.252	0.297	35.7	37.1	9.09	42.755	3.44	2.881	26.21	25.651	37.08	3.3	0.14	2.86
D6267	杜春茜	2	1	19	0.127	18	10	10	0.04	1.39794	1	0	1.2	-0.0791812	-6	-0.75	0.25	-0.25	0.25	-0.25	3.08	0.547	3.627	43.4	44	7.66	3.01	0.446	3.456	0.171	36.5	38.9	8.68	2.99	0.44	3.43	0.197	37.7	39.2	8.6	44.395	3.66	3.113	25.6	25.053	38.91	3.54	0.12	3.094
		2	2	19	0.123	18	11	11	0.04	1.39794	1.2	-0.0791812	1.2	-0.0791812	-5.25	-0.75	0	-0.25	0	-0.75	3.1	0.547	3.647	42.6	43.5	7.77	3.05	0.452	3.502	0.145	36.1	38.3	8.8	3.03	0.446	3.476	0.171	37	38.7	8.72	43.705	3.71	3.163	25.62	25.073	38.645	3.55	0.16	3.098
D6295	赵江槊	1	1	27	0.068	16	8	9	0.3	0.522879	1	0	1	0	-2.75	0	0.5	-0.75	-1	0	3.32	0.522	3.842	40.8	41.3	8.18	3.33	0.476	3.806	0.036	38.1	39.2	8.61	3.36	0.48	3.84	0.002	38	39	8.65	41.665	3.8	3.278	25.69	25.168	39.295	3.82	0.12	3.344
		1	2	27	0.076	15	8	8	0.3	0.522879	1	0	1	0	-2.75	-0.5	-0.5	-0.5	-1.25	0.25	3.31	0.527	3.837	40.7	41.1	8.2	3.29	0.456	3.746	0.091	37.4	38.5	8.77	3.33	0.469	3.799	0.038	37.1	38.3	8.82	41.515	3.84	3.313	25.86	25.333	38.75	3.81	0.13	3.354
D6283	王彤宇	1	1	21	0.095	20	13	12	0.25	0.60206	1	0	1.2	-0.0791812	-3.75	-0.75	-0.5	0.25	-0.75	0	3.28	0.545	3.825	40.6	41.1	8.22	3.17	0.463	3.633	0.192	35.6	37.1	9.09	3.11	0.467	3.577	0.248	36.3	37.3	9.04	41.34	3.79	3.245	25.8	25.255	37.275	3.65	0.14	3.187
		1	2	21	0.086	19	13	13	0.12	0.920819	1	0	1	0	-3.25	-0.75	-0.25	-0.5	-0.75	0.25	3.27	0.536	3.806	40.1	40.6	8.3	3.18	0.46	3.64	0.166	35.7	37.1	9.09	3.16	0.47	3.63	0.176	35.7	37.2	9.08	40.84	3.71	3.174	25.77	25.234	37.38	3.47	0.24	3.01
D6253	仇昌	1	1	18	0.074	15	13	9.3	0.1	1	1	0	1	0	-2.75	-0.25	0.25	0.5	0.25	1	3.28	0.529	3.809	40.3	41	8.23	3.25	0.471	3.721	0.088	36.7	38.3	8.81	3.23	0.473	3.703	0.106	37.1	38.5	8.76	41.215	3.73	3.201	26.36	25.831	38.57	3.64	0.09	3.169
		1	2	18	0.084	17	11	10.7	0.1	1	1	0	1.2	-0.0791812	-3.25	-0.25	-0.75	0.25	-0.5	0.25	3.35	0.532	3.882	40	40.8	8.27	3.28	0.463	3.743	0.139	36.3	37.7	8.94	3.27	0.463	3.733	0.149	36.3	37.8	8.92	40.96	3.83	3.298	25.65	25.118	37.99	3.74	0.09	3.277
D6331	马山	1	1	18	0.112	14	9	9	0.1	1	1.2	-0.0791812	1.2	-0.0791812	-5.5	-0.25	-0.25	0	0.25	0.25	3	0.555	3.555	41	41.9	8.06	2.93	0.472	3.402	0.153	36.1	37.8	8.93	3.01	0.477	3.487	0.068	36	37.7	8.95	42.225	3.58	3.025	26.15	25.595	38.1	3.55	0.03	3.078
		1	2	18	0.123	14	10	9	0.1	1	1.2	-0.0791812	1.2	-0.0791812	-5.5	0	-0.5	0	-0.25	0	3.01	0.566	3.576	41.1	41.9	8.06	3.01	0.469	3.479	0.097	35	37	9.13	3.03	0.467	3.497	0.079	35.1	37	9.13	42.035	3.54	2.974	25.5	24.934	37.155	3.49	0.05	3.021
D6308	贾松婷	2	1	18	0.085	15	8	10.5	0.1	1	1.2	-0.0791812	1.2	-0.0791812	-3	-0.5	0.5	-0.25	-1.5	-0.25	3.44	0.501	3.941	42.7	43.4	7.78	3.23	0.455	3.685	0.256	39	40.4	8.36	3.42	0.443	3.863	0.078	39	40.4	8.36	43.76	3.93	3.429	25.48	24.979	40.625	3.86	0.07	3.405
		2	2	18	0.07	15	7	8	0.12	0.920819	1	0	1.2	-0.0791812	-2.25	-0.5	0	-0.25	-1.25	0	3.36	0.511	3.871	42.6	43.2	7.81	3.33	0.442	3.772	0.099	39.5	40.8	8.26	3.31	0.45	3.76	0.111	39.5	40.8	8.27	43.475	3.93	3.419	25.08	24.569	41.25	3.9	0.13	3.458
D6367	屈镇东	1	1	20	0.113	16	9	10	0.3	0.522879	1.2	-0.0791812	1.2	-0.0791812	-4.75	-1	0	0	0.75	0.75	3.27	0.53	3.8	41.6	42.3	7.98	3.22	0.453	3.673	0.127	36.5	38.2	8.82	3.23	0.442	3.672	0.128	36.9	38.1	8.85	42.455	3.88	3.35	26.44	25.91	38.31	3.76	0.12	3.307
		1	2	20	0.106	14	10	9	0.25	0.60206	1	0	1	0	-4.5	-0.75	0	0.25	0	1	3.23	0.53	3.76	41	41.7	8.1	3.16	0.487	3.647	0.113	36.4	38	8.89	3.23	0.449	3.679	0.081	36.3	37.8	8.94	41.905	3.83	3.3	26.43	25.9	38.05	3.72	0.11	3.233
D5917	高肖倩	2	1	18	0.137	17	9	11	0.1	1	1	0	1	0	-6	-0.5	-0.75	-0.25	-0.5	0.25	3.26	0.557	3.817	43.4	43.8	7.7	3.22	0.44	3.66	0.157	36.2	38.2	8.85	3.28	0.463	3.743	0.074	37.7	39	8.66	44.04	3.86	3.303	26.07	25.513	37.885	3.66	0.2	3.22
		2	2	18	0.137	17	11	13	0.1	1	1.2	-0.0791812	1.2	-0.0791812	-6	-0.5	0	0.25	0	0.75	3.27	0.558	3.828	43.6	43.9	7.68	3.33	0.449	3.779	0.049	36.6	38.1	8.85	3.34	0.469	3.809	0.019	38	39.2	8.61	44.045	3.85	3.292	26.11	25.552	38.005	3.72	0.13	3.271
D6341	董雪	2	1	18	0.12	15	9	10	0.06	1.22185	1.2	-0.0791812	1.2	-0.0791812	-5.25	-0.5	0.25	-0.5	0.5	0	3.3	0.548	3.848	43.7	44.5	7.58	3.2	0.456	3.656	0.192	37.8	39.9	8.45	3.18	0.455	3.635	0.213	37.9	39.8	8.48	44.825	3.87	3.322	25.27	24.722	39.78	3.78	0.09	3.324
		2	2	18	0.124	16	10	9	0.06	1.22185	1.2	-0.0791812	1.2	-0.0791812	-5.5	-0.5	0.25	-0.7	0.25	0.25	3.22	0.554	3.774	44.3	44.7	7.56	3.16	0.466	3.626	0.148	37.1	39.3	8.58	3.16	0.467	3.627	0.147	37.5	39.5	8.55	44.74	3.9	3.346	25.38	24.826	39.455	3.7	0.2	3.234
D6375	郑杰飞	1	2	30	0.074	18	11	12	0.3	0.522879	1.2	-0.0791812	1.2	-0.0791812	-2.75	-0.5	0.5	0.5	0.5	0	2.62	0.547	3.167	41.2	41.9	8.05	2.6	0.492	3.092	0.075	37.3	38.9	8.69	2.58	0.494	3.074	0.093	37.7	39.2	8.62	41.985	3.19	2.643	24.67	24.123	38.995	3.13	0.06	2.638
D6347	马庚海	1	1	30	0.07	18	12	13	0.5	0.30103	1.2	-0.0791812	1.2	-0.0791812	-2.75	-0.5	0.5	-0.7	0.75	0.25	3.03	0.517	3.547	41.9	42.4	7.97	2.98	0.453	3.433	0.114	38.6	39.9	8.46	2.93	0.46	3.39	0.157	38.7	40	8.45	42.715	3.64	3.123	24.95	24.433	40.02	3.46	0.18	3.007
		1	2	18	0.081	14	7	7	0.6	0.221849	1	0	1.2	-0.0791812	-2	-0.5	0.5	0.25	-0.5	0.5	3.09	0.524	3.614	42.3	42.7	7.91	3.07	0.449	3.519	0.095	38.8	39.9	8.46	3.07	0.456	3.526	0.088	38.9	40	8.44	42.9	3.62	3.096	24.92	24.396	39.96	3.44	0.18	2.991
D6333	王蒙	1	1	18	0.111	15	10	8	0.1	1	1.2	-0.0791812	1.2	-0.0791812	-5.5	0	0.25	0.25	0	0.25	2.93	0.52	3.45	40.9	41.5	8.14	2.95	0.431	3.381	0.069	34.7	36.4	9.27	2.97	0.434	3.404	0.046	35.3	36.9	9.15	41.775	3.7	3.18	26.96	26.44	36.565	3.54	0.16	3.109
		1	2	21	0.114	15	9	9	0.1	1	1.2	-0.0791812	1.2	-0.0791812	-5.5	0.5	0.75	-0.5	-0.25	0	3.09	0.524	3.614	40.9	41.5	8.14	3.02	0.427	3.447	0.167	34.7	36.3	9.29	2.97	0.436	3.406	0.208	35.5	36.8	9.16	41.825	3.74	3.216	26.97	26.446	36.77	3.52	0.22	3.093
D6350	刘浩天	1	1	21	0.88	16	11	10	0.25	0.60206	1	0	1	0	-3	0.5	0.5	-0.25	-0.25	0	3.18	0.552	3.732	42.2	43	7.85	3.22	0.484	3.704	0.028	38.5	40.1	8.41	3.11	0.479	3.589	0.143	38.2	39.9	8.46	43.395	3.93	3.378	24.9	24.348	40.3	3.75	0.18	3.266
		1	2	19	0.105	19	13	12	0.2	0.69897	1.2	-0.0791812	1.2	-0.0791812	-3.25	0.5	0.25	0.25	0	0.5	3.35	0.557	3.907	42.2	43.1	7.84	3.23	0.468	3.698	0.209	38	39.5	8.54	3.15	0.467	3.617	0.29	37.5	39.2	8.61	43.2	3.87	3.313	25.19	24.633	39.78	3.79	0.08	3.322
D6344	杨玉潇	1	1	19	0.101	19	13	12	0.04	1.39794	1.2	-0.0791812	1.2	-0.0791812	-4.25	-0.75	0.25	0.5	0	0	3.65	0.531	4.181	43	43.4	7.77	3.57	0.438	4.008	0.173	37.5	39	8.65	3.57	0.439	4.009	0.172	37.7	39.3	8.6	43.815	4.02	3.489	25.51	24.979	39.06	3.93	0.09	3.492
		1	2	33	0.103	19	18	11	0.04	1.39794	1	0	1.2	-0.0791812	-4	-0.5	0.25	-0.5	-0.5	0	3.71	0.528	4.238	43	43.5	7.76	3.56	0.44	4	0.238	38	39.3	8.58	3.6	0.439	4.039	0.199	38.3	39.6	8.52	44.49	4.09	3.562	25.38	24.852	39.525	4	0.09	3.56
D6248	王晓彤	2	1	33	0.13	20	19	12	0.12	0.920819	1.2	-0.0791812	1.2	-0.0791812	-5	-0.25	-0.5	-0.5	-0.5	0.25	3.29	0.579	3.869	42	42.8	7.88	3.35	0.486	3.836	0.033	37	38.5	8.76	3.33	0.483	3.813	0.056	37.2	38.8	8.7	43.28	3.96	3.381	26.15	25.571	38.685	3.88	0.08	3.394
		2	2	20	0.113	12	7	8	0.12	0.920819	1	0	1.2	-0.0791812	-4	-0.25	0.25	0.25	0.25	0.25	3.27	0.593	3.863	42.5	43.1	7.84	3.31	0.492	3.802	0.061	37.2	39	8.66	3.19	0.488	3.678	0.185	37.5	39	8.65	42.77	3.94	3.347	25.73	25.137	38.98	3.8	0.14	3.308
D6325	康子栩	1	1	20	0.101	13	8	8	0.1	1	1.2	-0.0791812	1.2	-0.0791812	-4.75	0	0.25	0.25	0.25	0.25	3.55	0.51	4.06	43.1	43.9	7.69	3.38	0.428	3.808	0.252	38.2	40	8.44	3.31	0.431	3.741	0.319	38.4	40	8.43	44.21	4.17	3.66	25.41	24.9	40.275	3.89	0.28	3.462
		1	2	18	0.104	15	9	8	0.12	0.920819	1.2	-0.0791812	1.2	-0.0791812	-4.5	-0.5	-0.75	-0.75	0.5	0.5	3.47	0.515	3.985	43	43.7	7.73	3.3	0.413	3.713	0.272	37.5	39.4	8.56	3.34	0.419	3.759	0.226	37.9	39.5	8.55	44.12	4.02	3.505	25.2	24.685	39.64	3.93	0.09	3.517
D6366	贾梦瑶	2	1	18	0.138	14	11	10	0.15	0.823909	1.2	-0.0791812	1.2	-0.0791812	-6	-0.5	-0.5	0.5	0.25	0.25	2.84	0.58	3.42	41.9	42.7	7.91	2.71	0.466	3.176	0.244	35	37.2	9.08	2.72	0.473	3.193	0.227	35.3	37.2	9.02	43.085	3.47	2.89	26.01	25.43	37.345	3.17	0.3	2.704
		2	2	18	0.136	18	11	11	0.15	0.823909	1.2	-0.0791812	1.2	-0.0791812	-6	-0.5	0.25	0.25	0.5	0.25	2.8	0.591	3.391	42.5	43.2	7.81	2.7	0.481	3.181	0.21	34.8	36.9	9.14	2.74	0.484	3.224	0.167	34.9	36.9	9.15	43.375	3.38	2.789	25.92	25.329	37.05	3.17	0.21	2.689
D6324	刘梦璇	2	1	18	0.089	17	11	11	0.12	0.920819	1.2	-0.0791812	1.2	-0.0791812	-3	-0.5	0.5	0.25	0.25	0.5	3.25	0.532	3.782	41	41.6	8.11	3.19	0.457	3.647	0.135	37	38.5	8.76	3.1	0.468	3.568	0.214	36.8	38.5	8.77	41.955	3.89	3.358	26	25.468	38.71	3.78	0.11	3.323
		2	2	18	0.101	12	9	9	0.12	0.920819	1.2	-0.0791812	1.2	-0.0791812	-3.75	-0.5	-0.5	-0.25	-0.25	-0.75	3.4	0.535	3.935	41.1	41.7	8.09	3.24	0.458	3.698	0.237	37.3	38.5	8.77	3.19	0.457	3.647	0.288	36.3	37.9	8.91	42.065	4.02	3.485	26.34	25.805	38	3.84	0.18	3.382
D6362	张雉岩	2	1	18	0.137	13	9	8	0.12	0.920819	1.2	-0.0791812	1.2	-0.0791812	-6	-0.5	-0.25	-0.25	-0.5	-0.5	3.29	0.55	3.84	43.9	44.5	7.58	3.23	0.439	3.669	0.171	36.6	38.6	8.75	3.18	0.437	3.617	0.223	37	38.9	8.68	44.765	3.95	3.4	26.3	25.75	38.555	3.74	0.21	3.301
		2	2	24	0.117	17	12	11	0.2	0.69897	1.2	-0.0791812	1.2	-0.0791812	-5.75	-0.5	0.25	0.5	0.25	0.75	3.31	0.558	3.868	44	44.5	7.58	3.2	0.455	3.655	0.213	37.5	39.5	8.54	3.23	0.459	3.689	0.179	38.1	39.8	8.47	44.675	3.94	3.382	25.38	24.822	39.405	3.73	0.21	3.275
D6352	段策义	1	1	28	0.121	15	8	9	0.1	1	1.2	-0.0791812	1.2	-0.0791812	-4.25	-0.25	-0.25	-0.5	-0.25	0	3.46	0.578	4.038	43.5	44	7.68	3.43	0.47	3.9	0.138	38.1	39.4	8.56	3.43	0.477	3.907	0.131	37.4	39.1	8.64	44.04	4.1	3.522	25.51	24.932	39.6	3.94	0.16	3.47
		1	2	28	0.118	12	8	9	0.1	1	1.2	-0.0791812	1.2	-0.0791812	-4.25	-0.5	-0.25	-0.25	-0.5	0.5	3.38	0.581	3.961	44	44.4	7.6	3.34	0.472	3.812	0.149	38.5	40	8.44	3.39	0.48	3.87	0.091	38.2	39.8	8.49	44.605	4.02	3.439	25.25	24.669	40.065	3.84	0.18	3.368
D6301	徐佩佩	1	1	18	0.086	16	9	10	0.15	0.823909	1.2	-0.0791812	1.2	-0.0791812	-3.25	-0.25	-0.25	-0.5	-0.25	0	3.03	0.546	3.576	43.4	44	7.67	3.01	0.469	3.479	0.097	39	40.5	8.33	2.88	0.473	3.353	0.223	39	40.5	8.33	44	3.68	3.134	24.96	24.414	40.64	3.73	0.09	3.261
		1	2	18	0.094	17	8	11	0.15	0.823909	1.2	-0.0791812	1.2	-0.0791812	-3.25	-0.5	-0.25	0	0.25	0	2.94	0.548	3.488	43.6	44.2	7.64	2.91	0.469	3.379	0.109	38.8	40.4	8.35	2.78	0.467	3.247	0.241	38.5	40.2	8.4	44.205	3.61	3.062	24.77	24.222	40.57	3.4	0.21	2.931
D6312	彭泽涵	1	1	30	0.113	14	16	13	0.12	0.920819	1	0	1.2	-0.0791812	-5.5	-0.25	0.5	0	-0.25	0	3.52	0.557	4.077	42.5	43.2	7.82	3.35	0.457	3.807	0.27	36.8	38.9	8.68	3.41	0.459	3.869	0.208	36.8	38.3	8.69	43.49	4.08	3.523	26.02	25.463	38.4	4	0.08	3.543
		1	2	30	0.112	14	14	13	0.1	1	1	0	1.2	-0.0791812	-5	-0.5	-0.5	-0.25	-0.5	0.25	3.52	0.548	4.068	42.9	43.7	7.72	3.44	0.458	3.898	0.17	37.5	39.2	8.6	3.41	0.452	3.862	0.206	37.8	39.4	8.57	42.97	4.16	3.612	25.79	25.242	39.335	4.04	0.12	3.582
D6415	张伟文	1	1	21	0.074	14	10	9	0.3	0.522879	1	0	1	0	-3	-0.5	-0.25	-0.25	-1	-1.25	3.21	0.528	3.738	41.7	41.9	8.05	3.09	0.475	3.565	0.173	38.8	39.6	8.52	3.17	0.47	3.64	0.098	38.4	39.3	8.59	42.225	3.85	3.322	25.68	25.152	39.805	3.7	0.15	3.225
		1	2	21	0.069	14	8	8	0.3	0.522879	1	0	1.2	-0.0791812	-3	-0.5	-0.5	-0.75	-0.75	-1.25	3.29	0.526	3.816	41.3	41.7	8.09	3.18	0.477	3.657	0.159	39	39.5	8.55	3.25	0.463	3.713	0.103	38.4	39.3	8.59	41.99	3.82	3.294	25.65	25.124	39.71	3.71	0.11	3.233
D6191	赵雪菲	2	1	19	0.117	16	10	9	0.1	1	1	0	1.2	-0.0791812	-4.75	-0.5	0	0.25	0	0.25	2.71	0.557	3.267	42	42.7	7.91	2.66	0.448	3.108	0.159	35.8	37.7	8.95	2.69	0.459	3.149	0.118	36.3	38	8.89	43.045	3.25	2.693	25.31	24.753	37.885	3.12	0.13	2.672
		2	2	19	0.096	15	10	9	0.15	0.823909	1	0	1.2	-0.0791812	-4.25	-0.25	0	-0.5	-0.25	0.25	2.68	0.553	3.233	42.1	42.9	7.87	2.61	0.465	3.075	0.158	36.6	38.6	8.74	2.69	0.476	3.166	0.067	37	38.7	8.71	43.165	3.23	2.677	24.87	24.317	38.75	3.09	0.14	2.625
D6403	尹媛华	2	1	18	0.083	15	8	10	0.12	0.920819	1.2	-0.0791812	1.2	-0.0791812	-4	-0.5	0.25	0	0.25	0.25	3.08	0.581	3.661	43.8	44.5	7.58	3.08	0.501	3.581	0.08	39.6	40.8	8.28	3.04	0.506	3.546	0.115	39.8	40.9	8.25	44.79	3.76	3.179	24.92	24.339	40.815	3.63	0.13	3.129
		2	2	18	0.094	15	9	11	0.15	0.823909	1.2	-0.0791812	1.2	-0.0791812	-4.75	-0.5	0.25	0.25	0.5	0.25	2.95	0.592	3.542	44.2	44.8	7.54	2.94	0.498	3.438	0.104	39	40.7	8.3	2.83	0.492	3.322	0.22	39	40.6	8.32	44.82	3.71	3.118	24.7	24.108	40.79	3.42	0.29	2.922
D6293	靳梦瑶	2	1	29	0.094	17	11	10	0.08	1.09691	1.2	-0.0791812	1.2	-0.0791812	-3.5	0.5	-0.25	-0.25	-0.25	-0.25	3.56	0.53	4.09	43.2	43.7	7.72	3.45	0.45	3.9	0.19	38.8	40.1	8.41	3.49	0.461	3.951	0.139	39.1	40.4	8.35	43.835	4.16	3.63	24.69	24.16	40.255	3.92	0.24	3.47
		2	2	29	0.087	16	9	10	0.1	1	1.2	-0.0791812	1.2	-0.0791812	-3.25	-0.5	0	0.5	0.25	0	3.64	0.544	4.184	43	43.7	7.73	3.48	0.463	3.943	0.241	38.8	40.5	8.32	3.52	0.47	3.99	0.194	39.2	40.7	8.3	43.98	4.2	3.656	24.7	24.156	40.86	4.01	0.19	3.547
D5263	王婕妤	2	1	21	0.103	18	14	9	0.1	1	1	0	1.2	-0.0791812	-4.75	-0.5	-0.5	-0.25	-0.25	0.25	3.18	0.524	3.704	40.9	41.6	8.12	3.16	0.439	3.599	0.105	35.9	37.4	9.01	3.14	0.445	3.585	0.119	35.9	37.4	9.02	42.01	3.78	3.256	25.9	25.376	37.44	3.71	0.07	3.271
		2	2	21	0.115	19	17	9	0.1	1	1	0	1.2	-0.0791812	-5.75	-0.5	-0.5	-0.25	-0.75	0.25	3.2	0.525	3.725	41	41.6	8.12	3.15	0.423	3.573	0.152	35.4	36.8	9.17	3.18	0.435	3.615	0.11	35.3	36.9	9.16	42.035	3.81	3.285	26.36	25.835	36.75	3.72	0.09	3.297
D6337	王洋	1	1	36	0.087	11	8	9	0.3	0.522879	1	0	1.2	-0.0791812	-4.25	-0.5	-0.25	-0.5	-0.5	0.25	3.3	0.523	3.823	42.2	42.6	7.93	3.32	0.448	3.768	0.055	38.4	39.7	8.5	3.21	0.444	3.654	0.169	38.2	39.4	8.57	42.805	3.96	3.437	26.11	25.587	39.8	3.85	0.11	3.402
		1	2	24	0.08	18	11	10	0.3	0.522879	1.2	-0.0791812	1.2	-0.0791812	-3.75	-0.25	0.25	0	0	0.25	3.34	0.532	3.872	42.3	42.8	7.89	3.4	0.424	3.824	0.048	37.1	38.7	8.72	3.37	0.428	3.798	0.074	36.9	38.3	8.81	43.01	3.98	3.448	26.64	26.108	38.685	3.91	0.07	3.486
D6261	李青雨	1	1	24	0.105	17	10	11	0.06	1.22185	1.2	-0.0791812	1.2	-0.0791812	-4.25	-0.5	0.25	0	0	-0.25	3.27	0.565	3.835	41.7	42.2	8	2.21	0.477	2.687	1.148	37	38.3	8.8	3.18	0.479	3.659	0.176	37.1	38.4	8.78	42.44	3.79	3.225	26.1	25.535	38.49	3.67	0.12	3.193
		1	2	21	0.097	17	12	10	0.06	1.22185	1	0	1	0	-3.25	-0.5	0.25	0	-1	0	3.17	0.564	3.734	41.8	42.2	8.01	3.15	0.482	3.632	0.102	37.7	38.8	8.7	3.12	0.488	3.608	0.126	37.5	38.7	8.73	42.445	3.74	3.176	25.71	25.146	38.82	3.6	0.14	3.118
[truncated: 62 more columns]

## Sheet: Sheet5
性别
1	男
2	女
眼别
1	右眼
2	左眼
